# Supplementary material
Source: publisher figshare collection journal article supplement (https://karger.figshare.com/ndownloader/files/27958836)
Supplement: Supplementary file 1 [file 27958836]

**Supplementary Table 3:** Quality assessment of included studies using Newcastle-Ottawa scale adapted for cross-sectional studies

| **Study ID** | **Selection (5)** | **Comparability (2)** | **Outcome (3)** | **Total (10)** |
| --- | --- | --- | --- | --- |
| Tefera et al. [31] | **5** | **2** | **3** | **10** |
| Abegaz et al. [32] | **4** | **2** | **3** | **9** |
| Yedesa et al. [33] | **3** | **2** | **3** | **8** |
| Sada et al. [34] | **3** | **0** | **2** | **5** |
| Teka et al. [35] | **5** | **2** | **3** | **10** |
| Getachew et al. [36] | **4** | **2** | **3** | **9** |
| Mekonnen et al. [37] | **4** | **0** | **3** | **7** |
| Teni et al. [38] | **5** | **2** | **3** | **10** |
